# Supplementary material for: An integrated study on the comprehensive mechanism of Schisandra chinensis polysaccharides mitigating Alzheimer's disease in rats using a UPLC-Q-TOF-MS based serum and urine metabolomics strategy
Source: Royal Society of Chemistry journal article supplement (doi:10.1039/d2fo02842e), 2022-12-23
Supplement: d2fo02842e1.pdf [file d2fo02842e1.pdf]

1 **Supporting Information**

2 **An integrated study on the comprehensive mechanism of *schisandra chinensis***

3 **polysaccharides mitigating Alzheimer's disease rats using a UPLC-Q-TOF-MS**

4 **based serum and urine metabolomics strategy**

5

6 Jun Fu<sup>a,b</sup>, Jixun Li<sup>a,b</sup>, Yuzhen Sun<sup>a,b</sup>, Shu Liu<sup>b</sup>, Fengrui Song<sup>b</sup>, Zhongying Liu<sup>a\*</sup>

7

8 **Affiliation**

9 <sup>a</sup> *School of Pharmaceutical Sciences, Jilin University, Changchun 130021, China.*

10 <sup>b</sup> *Jilin Provincial Key Laboratory of Chinese Medicine Chemistry and Mass*

11 *Spectrometry, Changchun; Institute of Applied Chemistry, Chinese Academy of*

12 *Sciences & National Center of Mass Spectrometry in Changchun, Changchun, 130022,*

13 *China*

14

15 \*Corresponding author: Zhongying Liu, School of Pharmaceutical Sciences, Jilin

16 University, Changchun 130021, China. E-mail address: liuzy@jlu.edu.cn

18 **Table of contents**

19 1. Fig. S1 in page 3.

20 2. Fig. S2 in page 4.

21 3. Fig. S3 in page 5

22 4. Fig. S4 in page 6

23 5. Fig. S5 in page 7

24

25

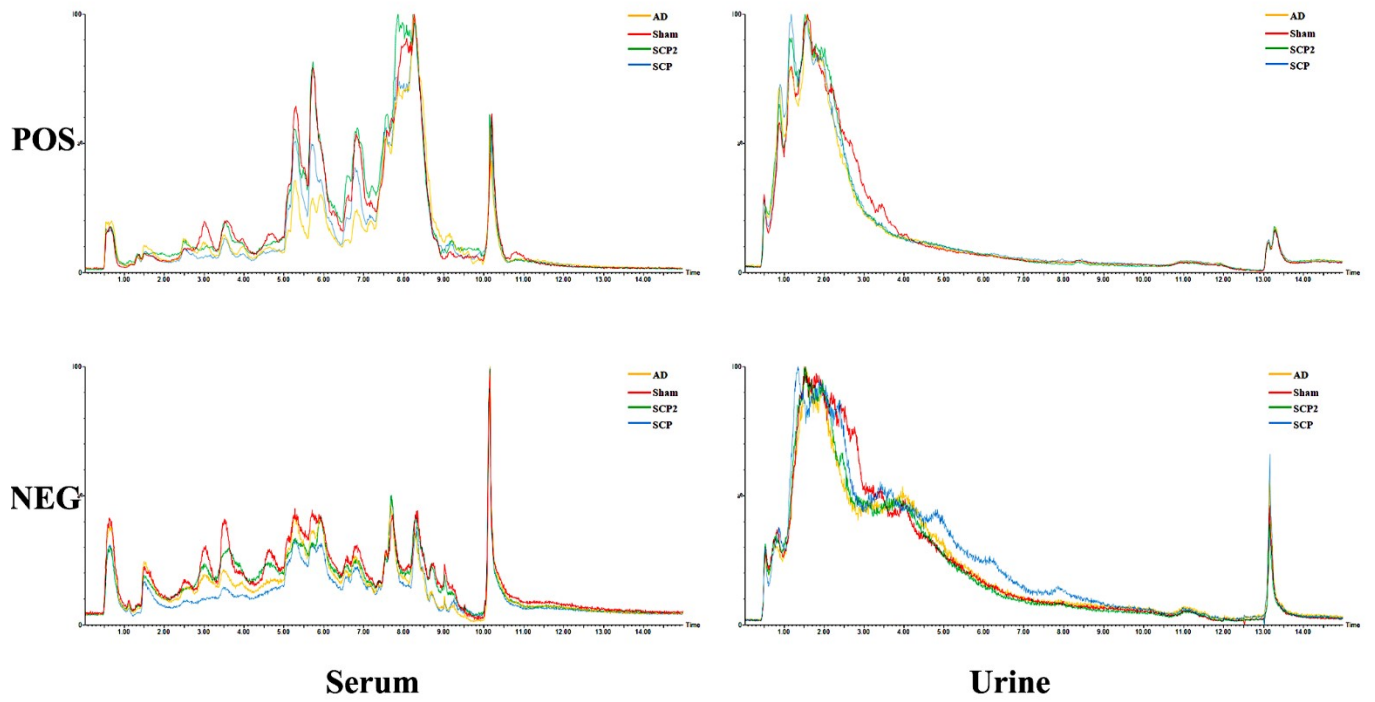

26 Fig. S1 Total ion chromatograms (TIC) of serum and urine samples obtained by UPLC-  
 27 Q-TOF/MS in both positive and negative ion mode  
 28

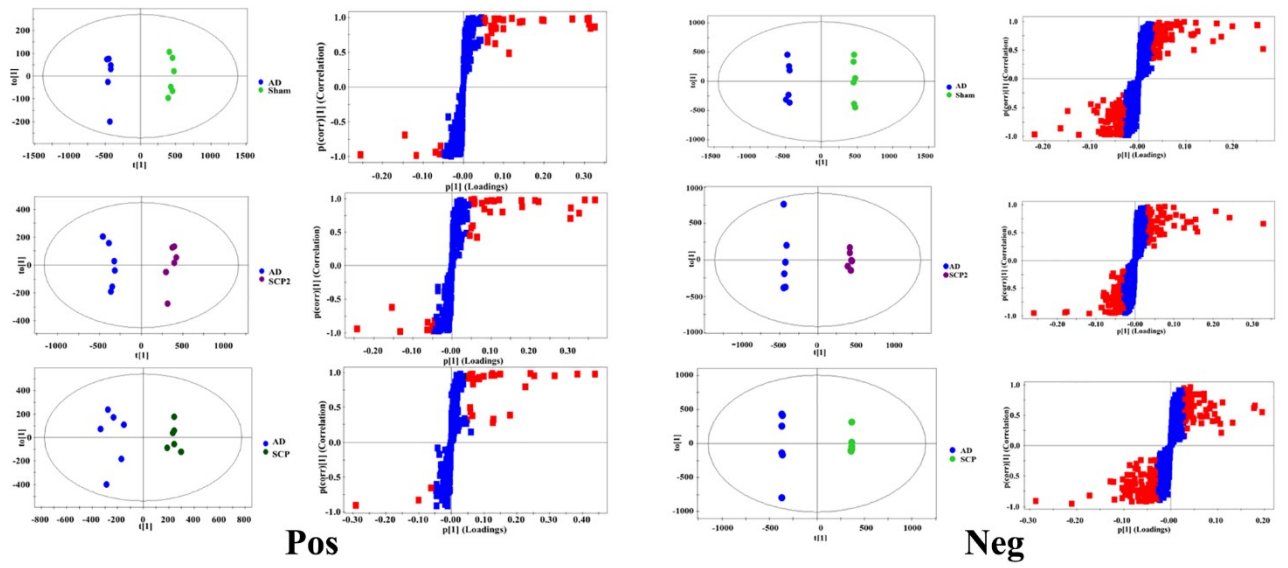

29 Fig. S2 OPLS-DA score plot and corresponding S-polt of serum in positive and negative  
 30 ion mode  
 31

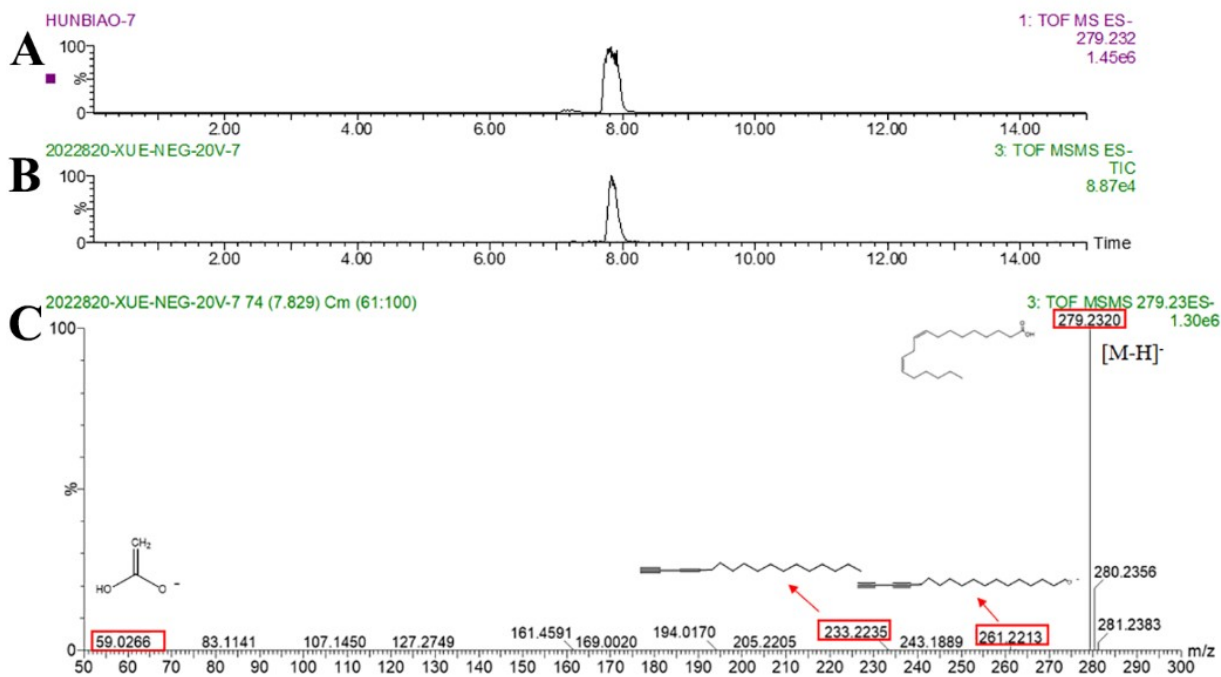

32 Fig. S3 The UPLC-Q-TOF/MS base peak intensity (BPI) spectrum of reference  
 33 standard (Linoleic acid) (A). The extracted ion chromatogram of ion at  $m/z$  279.2320  
 34 was shown at (B) and MS/MS spectra from the QC sample in negative ion mode (C) at  
 35 collision energy of 20 ev.  
 36

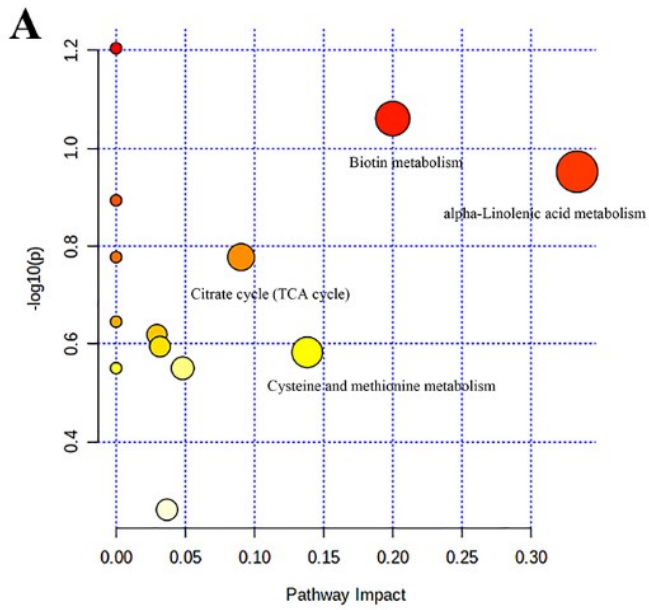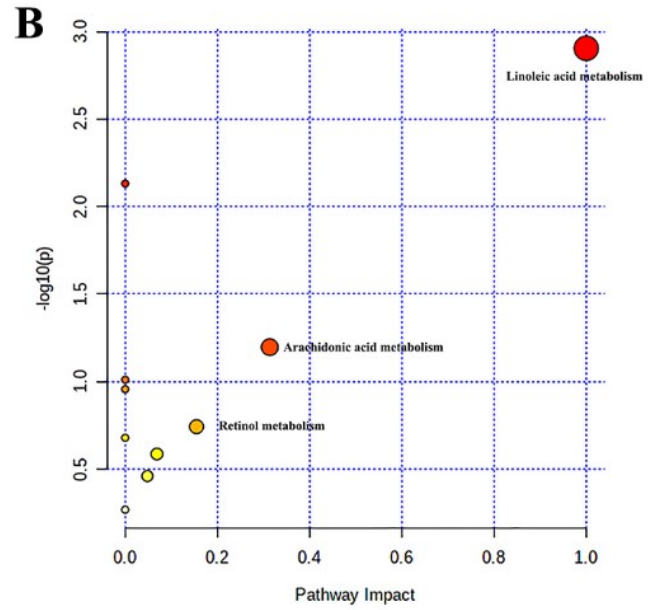

37 Fig S4. Summary of the altered metabolism pathways. (A) Metabolism pathway  
 38 analysis of urine samples. (B) Metabolism pathway analysis of serum samples. The size  
 39 and color of each circle was based on pathway impact value and P-value, respectively.  
 40

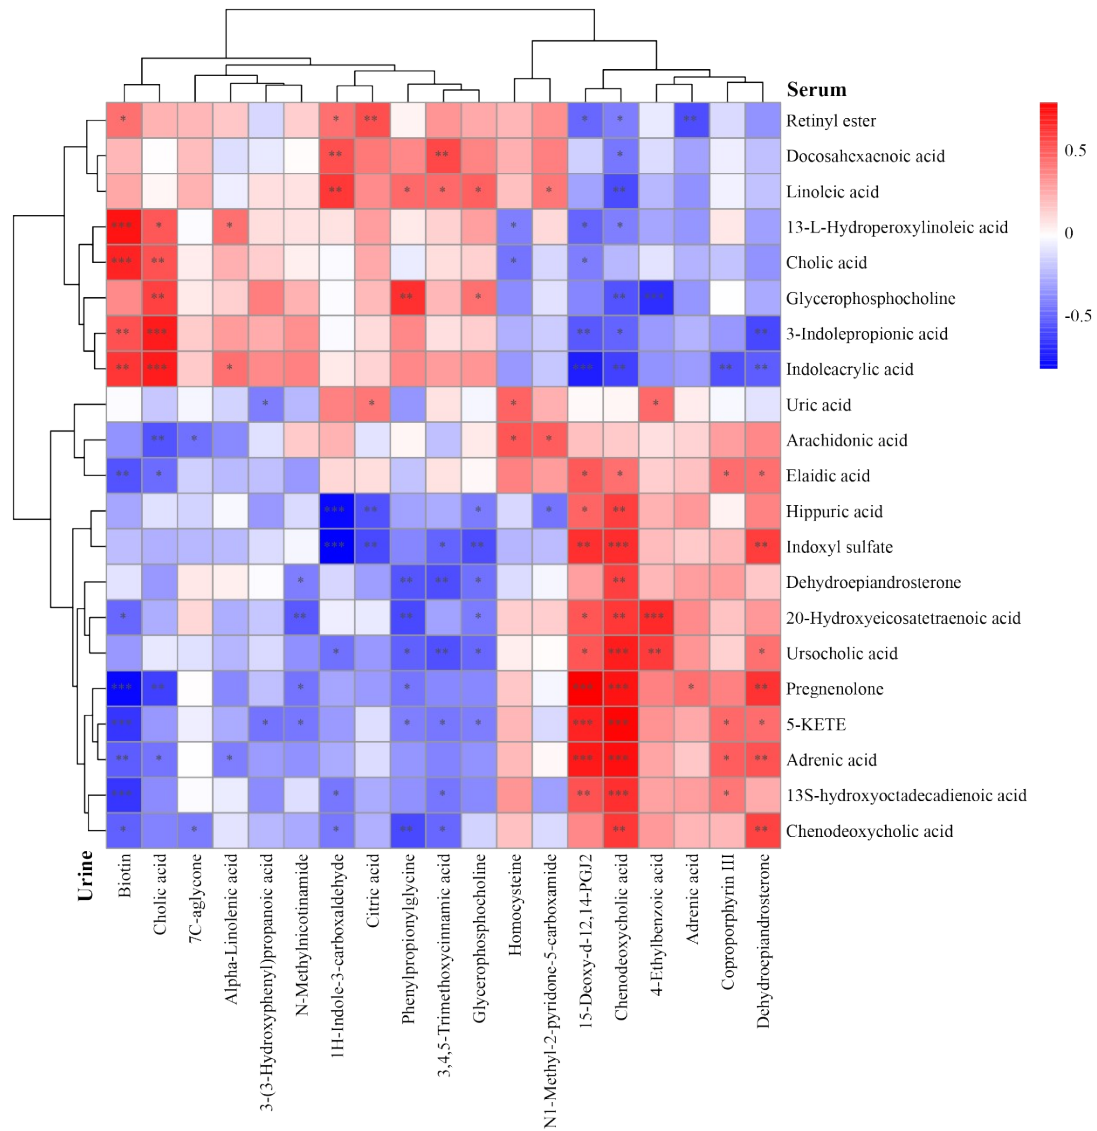

41

42 Fig S5. Heatmap of Spearman's rank correlation coefficients between plasma and urine  
43 metabolites.

44
